# Supplementary material for: Interfacial adhesion enhancement of ink-jet printed transparent metallic grid electrodes induced by the coffee-ring effect
Source: Royal Society of Chemistry journal article supplement (doi:10.1039/c5tc04317d), 2016-01-01
Supplement: c5tc04317d1.pdf [file c5tc04317d1.pdf]

## Interfacial adhesion enhancement of inkjet printed transparent metallic grids electrodes induced by coffee-ring effect

Zhiliang Zhang <sup>\*ac</sup> and Jun Liu <sup>b</sup>

<sup>a</sup>Shandong Provincial Key Laboratory of Fine Chemicals, School of Chemistry and Pharmaceutical Engineering, Qilu University of Technology, Jinan 250353, China

<sup>b</sup>School of Leather Chemistry and Engineering, Faculty of Light Industry, Qilu University of Technology, Jinan 250353, China

<sup>c</sup>Beijing National Laboratory for Molecular Sciences (BNLMS), Institute of Chemistry, Chinese Academy of Sciences, Beijing 100190, China

\*Email: [zhzhl@iccas.ac.cn](mailto:zhzhl@iccas.ac.cn)

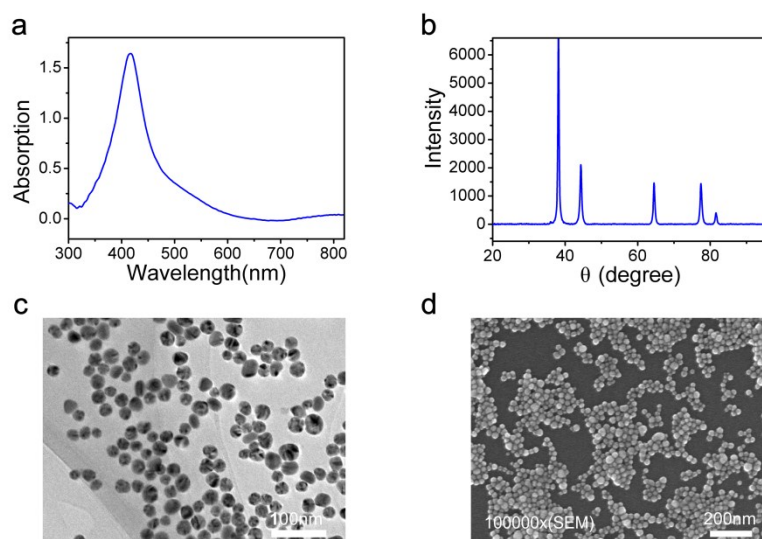

**Fig.S1** (a) UV-vis spectrum, (b) XRD spectrum, (c) TEM and (d) SEM images of the synthesized AgNPs.

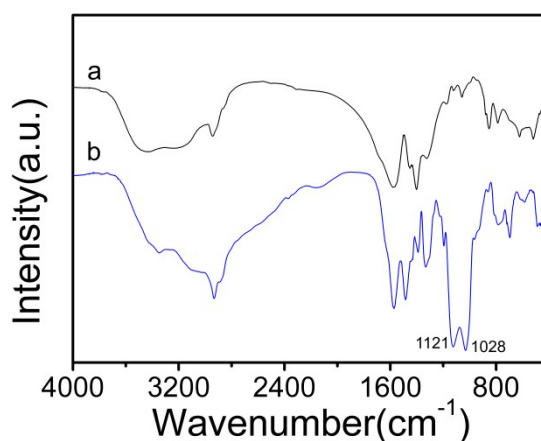

**Fig.S2** (a) IR of AgNPs in initial state (b) IR of AgNPs after APTS treatment

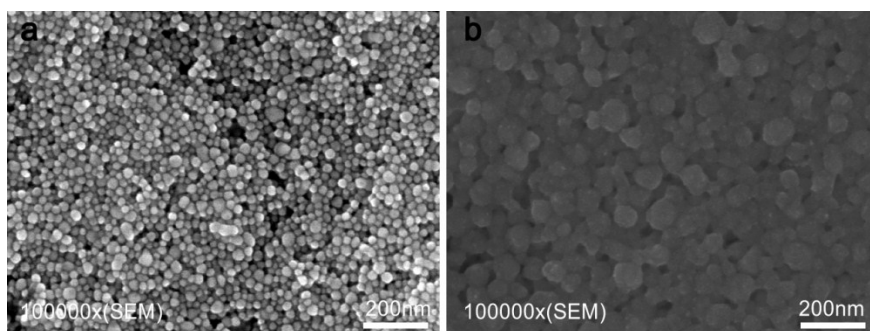

**Fig.S3** (a) SEM image of the ink-jet printed AgNPs after APTS treatment (b) the surface topography changes after sintering treatment

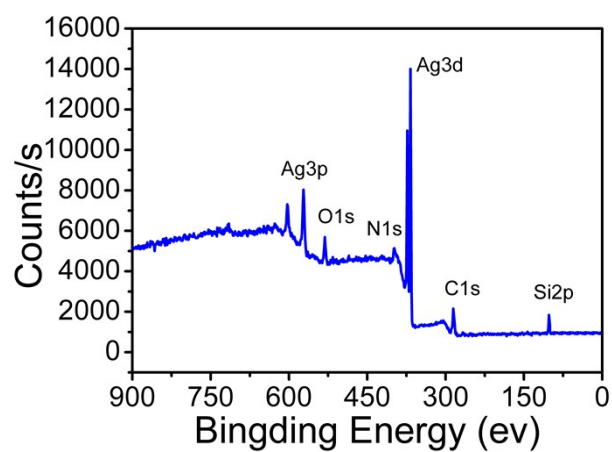

**Fig.S4** XPS of the AgNPs after the sintering treatment
